# Supplementary material
Source: PubMed Central journal article supplement (PMC3241012)
Supplement: NIHMS311973-supplement-4.pdf [file NIHMS311973-supplement-4.pdf]

**Appendix A: Definitions of Bariatric Surgery**

| <b>CPT-4<br/>Codes</b> | <b>Description</b>                                                                                                                                                          |
|------------------------|-----------------------------------------------------------------------------------------------------------------------------------------------------------------------------|
| <b>43770</b>           | Laparoscopy, surgical, gastric restrictive procedure: placement of adjustable gastric band                                                                                  |
| <b>43644</b>           | Laparoscopy, surgical, gastric restrictive procedure with gastric bypass and Roux-en-Y gastroenterostomy (roux limb 150 cm or less)                                         |
| <b>43645</b>           | Laparoscopy, surgical, gastric restrictive with gastric bypass and small intestine reconstruction to limit absorption                                                       |
| <b>43842</b>           | Gastric restrictive procedure, without gastric bypass, for morbid obesity, vertical banded gastroplasty                                                                     |
| <b>43843</b>           | Other gastric restrictive procedures, without gastric bypass, and other than Vertical Banded Gastroplasty                                                                   |
| <b>43844</b>           | Laparoscopic gastric restrictive procedure with gastric bypass and Roux en Y gastroenterostomy                                                                              |
| <b>43845</b>           | Gastric restrictive procedure with partial gastrectomy, pylorus-preserving duodenoileostomy and ileolieostomy to limit absorption (BPD)                                     |
| <b>43846</b>           | Gastric restrictive procedure, with gastric bypass, for morbid obesity; with short limb (less than 100 cm) Roux-en-Y gastroenterostomy                                      |
| <b>43847</b>           | Gastric restrictive procedure, with small intestine reconstruction to limit absorption; with long limb (>150 cm) Roux-en-Y                                                  |
| <b>43659</b>           | Gastrectomy, total; with Roux-en-Y reconstruction; Mini -gastric bypass                                                                                                     |
| <b>S2082</b>           | Laparoscopy, surgical; gastric restrictive procedure, adjustable gastric band includes placement of subcutaneous port                                                       |
| <b>S2085</b>           | Laparoscopic gastric bypass                                                                                                                                                 |
| <b>ICD-9<br/>Codes</b> | <b>Description</b>                                                                                                                                                          |
| <b>44.68</b>           | Laparoscopic gastroplasty<br>Banding<br>Silastic vertical banding<br>Vertical banded gastroplasty (VBG)<br>Code also any synchronous laparoscopic gastroenterostomy (44.38) |
| <b>44.95</b>           | Laparoscopic gastric restrictive procedure<br>Adjustable gastric band and port insertion                                                                                    |

**The following ICD-9 codes are considered to indicate bariatric surgery when used in conjunction with ICD-9 278.01 (Morbid Obesity) as any diagnosis.**

| <b>CPT-4 Codes</b> | <b>Description</b>                                                                                                                                               | <b>Additional Requirements</b> |
|--------------------|------------------------------------------------------------------------------------------------------------------------------------------------------------------|--------------------------------|
| <b>43.89</b>       | Partial gastrectomy with bypass gastrogastrostomy<br>Sleeve resection of stomach                                                                                 | with 278.01                    |
| <b>44.31</b>       | High gastric bypass<br>Printen and Mason gastric bypass                                                                                                          | with 278.01                    |
| <b>44.38</b>       | Laparoscopic gastroenterostomy<br>Bypass: gastroduodenostomy<br>gastroenterostomy<br>gastrogastrostomy<br>Laparoscopic gastrojejunostomy without gastrectomy NEC | with 278.01                    |
| <b>44.39</b>       | Other gastroenterostomy<br>Bypass<br>gastroduodenostomy<br>gastroenterostomy<br>gastrogastrostomy<br>Gastrojejunostomy without gastrectomy NOS                   | with 278.01                    |

**We excluded patients who have the following ICD-9 diagnosis codes during the same hospitalization as their bariatric procedure**

| <b>ICD-9</b> | <b>Description</b>                                        |
|--------------|-----------------------------------------------------------|
| <b>150.x</b> | Malignant neoplasm of esophagus                           |
| <b>151.x</b> | Malignant neoplasm of stomach                             |
| <b>152.x</b> | Malignant neoplasm of small intestine, including duodenum |
| <b>157.x</b> | Malignant neoplasm of pancreas                            |
| <b>199.x</b> | Malignant neoplasm without specification of site          |

\*\*\* The following three codes must have been listed as the primary diagnosis code for that hospitalization (we will not exclude patients who have these as secondary diagnoses)

|              |                                |
|--------------|--------------------------------|
| <b>531.x</b> | Gastric ulcer                  |
| <b>532.x</b> | Duodenal ulcer                 |
| <b>533.x</b> | Peptic ulcer, site unspecified |

**We excluded individuals with the follow revision codes prior to the procedure of interest.**

| <b>CPT-4 Codes</b> | <b>Description</b>                                                                                                                                         |
|--------------------|------------------------------------------------------------------------------------------------------------------------------------------------------------|
| 43771              | Laparoscopy, surgical, gastric restrictive procedure; revision of adjustable gastric restrictive device component only                                     |
| 43772              | Laparoscopy, surgical, gastric restrictive procedure; removal of adjustable gastric restrictive device component only                                      |
| 43773              | Laparoscopy, surgical, gastric restrictive procedure; removal and replacement of adjustable gastric restrictive device component only                      |
| 43774              | Laparoscopy, surgical, gastric restrictive procedure; removal of adjustable gastric restrictive device and subcutaneous port components                    |
| 43848              | Revision, open, of gastric restrictive procedure for morbid obesity other than adjustable gastric restrictive device (separate procedure)                  |
| 43850              | Revision of gastroduodenal anastomosis (gastroduodenostomy) with reconstruction; without vagotomy                                                          |
| 43855              | Revision of gastroduodenal anastomosis (gastroduodenostomy) with reconstruction; with vagotomy                                                             |
| 43860              | Revision of gastrojejunal anastomosis (gastrojejunostomy) with reconstruction with or without partial gastrectomy or intestine resection; without vagotomy |
| 43865              | Revision of gastrojejunal anastomosis (gastrojejunostomy) with reconstruction with or without partial gastrectomy or intestine resection; with vagotomy    |
| 43886              | Gastric restrictive procedure open; revision of subcutaneous port component only                                                                           |
| 43887              | Gastric restrictive procedure open; removal of subcutaneous port component only                                                                            |
| 43888              | Gastric restrictive procedure open; removal and replacement of subcutaneous port component only                                                            |
| 4469               | Other repair of stomach                                                                                                                                    |
| 4496               | Laparoscopic revision of gastric restrictive procedure                                                                                                     |
| 4497               | Laparoscopic removal of gastric restrictive device(s)                                                                                                      |
