# Supplementary material
Source: PubMed Central journal article supplement (PMC3241012)
Supplement: NIHMS311973-supplement-5.pdf [file NIHMS311973-supplement-5.pdf]

## **Appendix B. Medications for Treatment of Diabetes**

### **Oral medications**

Acarbose  
Chlorpropamide  
Glimepiride  
Glipizide  
Glyburide  
Metformin  
Miglitol  
Nateglinide  
Pioglitazone  
Pramlintide  
Repaglinide  
Rosiglitazone  
Sitagliptin  
Tolazamide  
Tolbutamide

### **Insulins**

Insulin Aspart  
Insulin Detemir  
Insulin Glargine  
Insulin Glulisine  
Insulin Human inhaled  
Insulin Human Isophane  
Insulin Regular  
Insulin Lispro

### **Other injectable**

Exenatide
